# Supplementary material for: Programmable nanoengineering templates for fabrication of three-dimensional nanophotonic structures
Source: PubMed Central journal article supplement (PMC3685551; doi:10.1186/1556-276x-8-268), 2013-06-07
Supplement: 1556-276X-8-268-S1.pdf [file 1556-276X-8-268-S1.pdf]

# Supporting Information

Programmable Nanoengineering Templates for Fabrication of  
Three-Dimensional Nanophotonic Structures

Qingfeng Lin, Siu-Fung Leung, Kwong-Hoi Tsui, Bo Hua and Zhiyong Fan\*

Department of Electronic and Computer Engineering, Hong Kong University of  
Science and Technology, Clear Water Bay, Kowloon, Hong Kong, China SAR

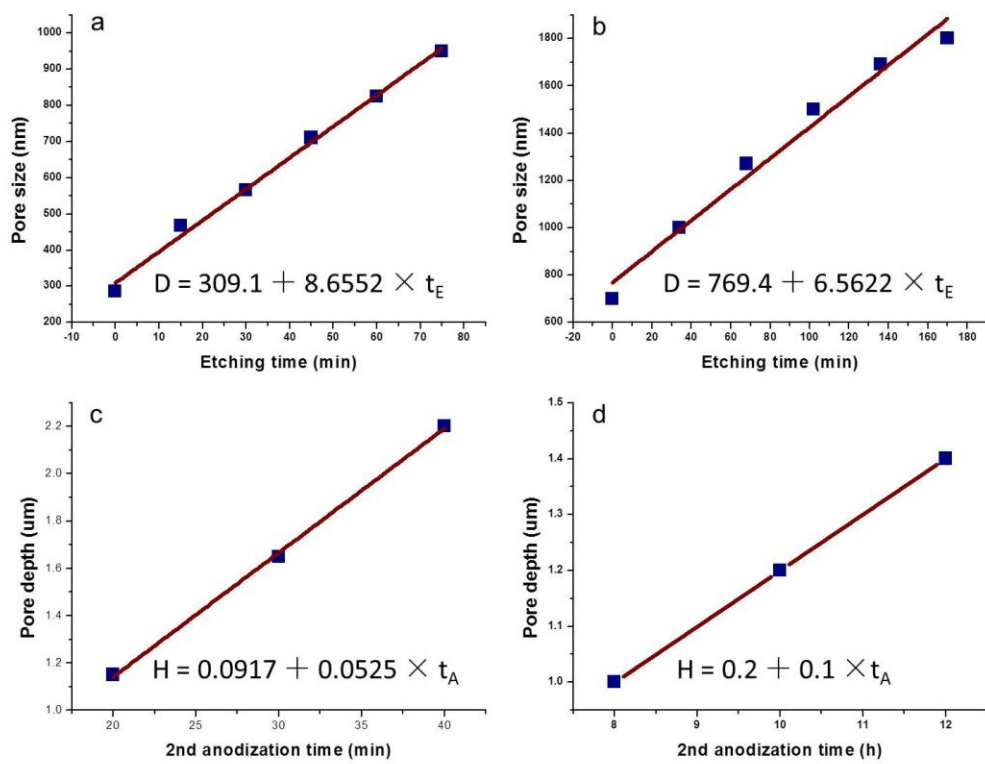

**Figure S1.** Pore size as a function of wet etching time in 5 wt% H<sub>3</sub>PO<sub>4</sub> at 53 °C for a) 1 μm pitch and b) 2 μm pitch AAM. Pore depth as a function of 2<sup>nd</sup> anodization time for c) 1 μm pitch and d) 2 μm pitch AAM.

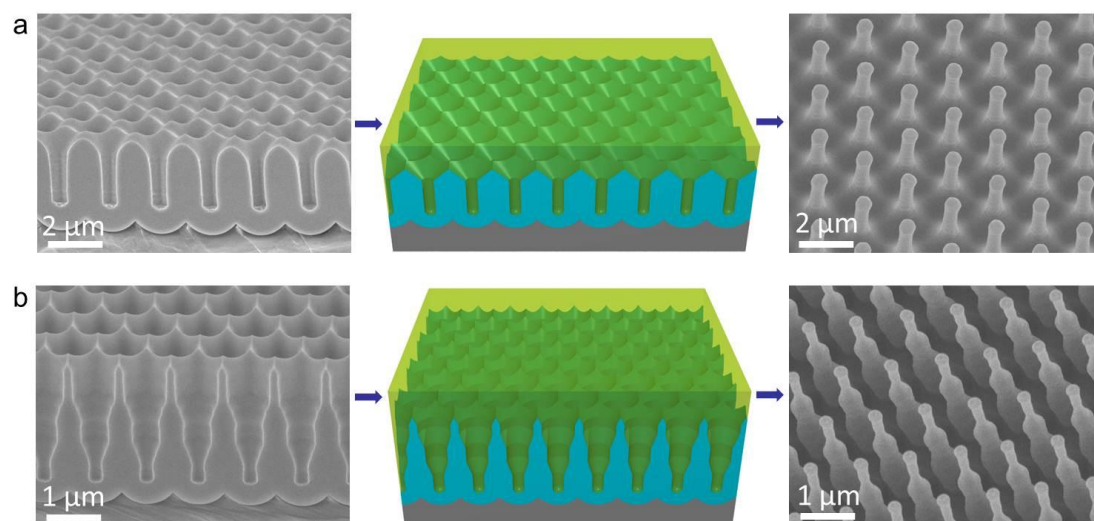

**Figure S2.** Thermal press process to template a) PC nanopillars and b) PC nanotowers.

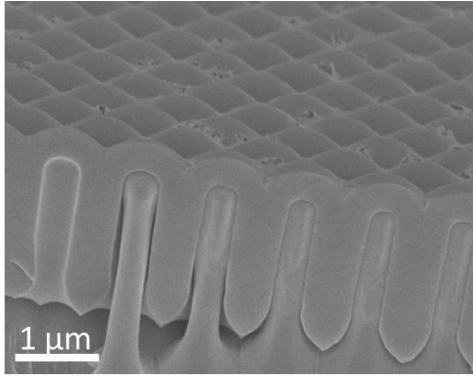

**Figure S3.** Cross-sectional view SEM image of PI nanopillars, showing that the beads on top of them are formed during peeling process.

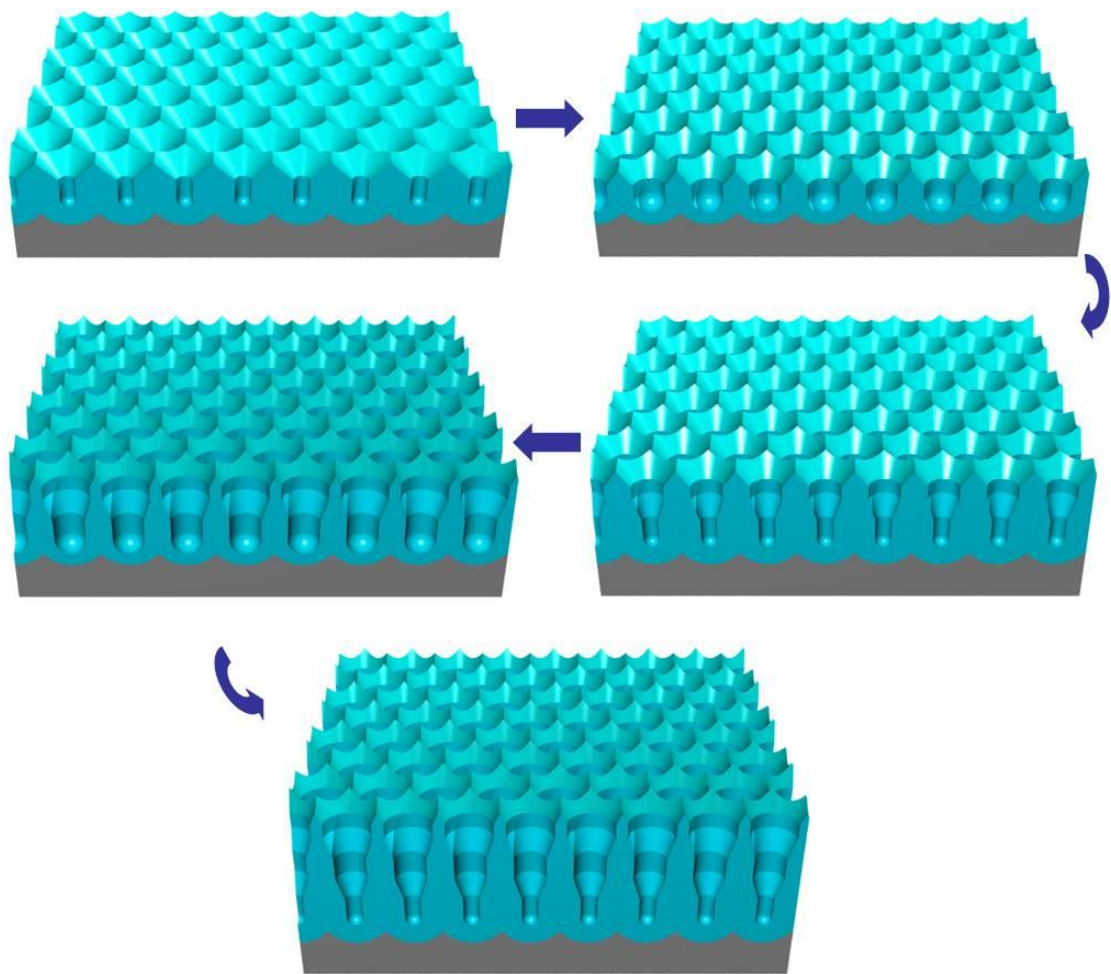

**Figure S4.** Schematic four-step anodization process for tri-diameter AAM, drawing from 2<sup>nd</sup> anodization.

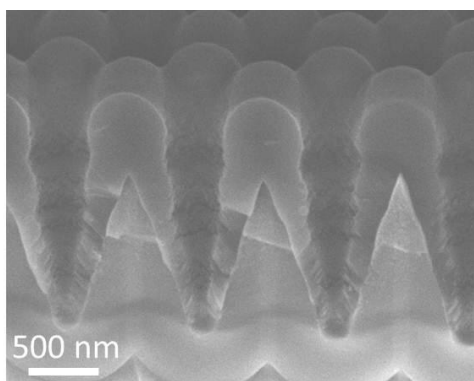

**Figure S5.** Cross-sectional view SEM image of a-Si nanocones embedded in AAM.
